# Supplementary material for: Anlotinib Inhibits the Growth of Breast Cancer Cells by Promoting Autophagy and Apoptosis via the Akt/GSK-3α&nbsp;Signalling Pathway
Source: Research Square preprint supplement (doi:10.21203/rs.3.rs-113481/v1), 2020-12-02
Supplement: Supplementary file 1 [file 1c909fe6c49c300d8529a811.docx]

**Supplemental Data**

Figure S1.


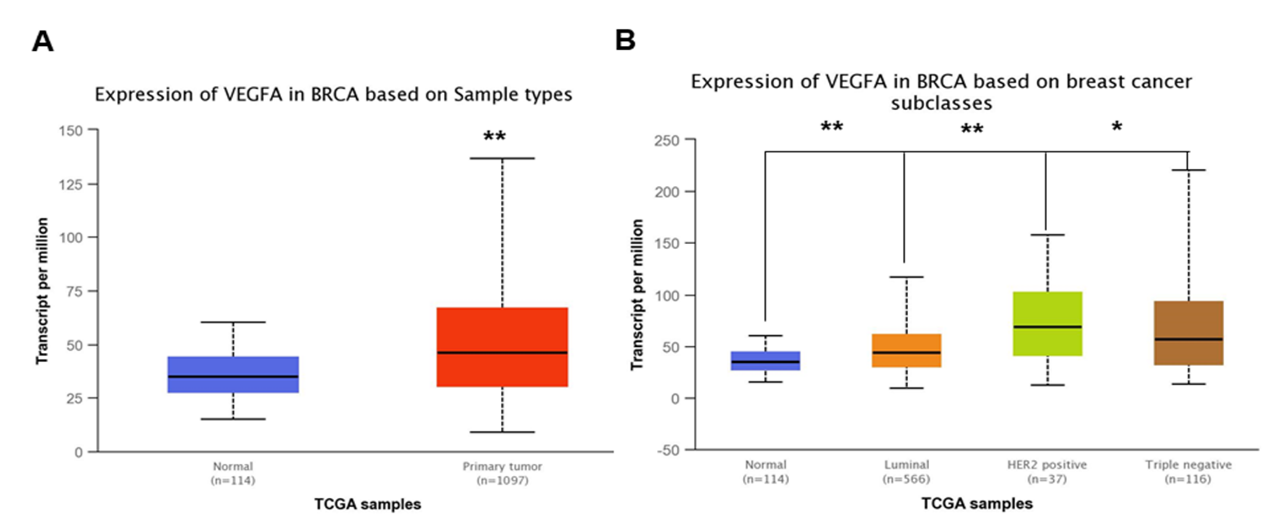


Table S1.

**Antibodies used in Western bolt and immunohistochemistry staining.**

| **Antibody** | **Cat. No.** | **Company** | **Country** | **Dilution** |
| --- | --- | --- | --- | --- |
| Ki67 | 27309-1-AP | Proteintech | USA | 1:1000 |
| BECN1 | 11306-1-AP | Proteintech | USA | 1:1000/1:50 |
| phospho-AKT S473 | 10176-2-AP | Proteintech | USA | 1:1000 |
| β-actin | 66009-1-Ig | Proteintech | USA | 1:5000 |
| Bak | 12105 | CST | USA | 1:1000 |
| Cytochrome c | 4280 | CST | USA | 1:1000 |
| Bcl-2 | 15071 | CST | USA | 1:1000 |
| Cleaved Caspase 9 | 20750 | CST | USA | 1:1000 |
| Cleaved Caspase 3 | 9664 | CST | USA | 1:1000 |
| Caspase 1 | 3866 | CST | USA | 1:1000 |
| LC3A/B | 12471 | CST | USA | 1:1000 |
| phospho-GSK-3α (Ser21) | 8452 | CST | USA | 1:1000 |
| GSK-3α | 4337 | CST | USA | 1:1000 |
| AKT | 9272 | CST | USA | 1:1000 |
| SQSTM1/p62 | ab56416 | Abcam | UK | 1:2000 |
| Cyclin D1 | ab40754 | Abcam | UK | 1:10000 |
| PARP1 | ab191217 | Abcam | UK | 1:10000 |
| Cleaved PARP1 | ab32064 | Abcam | UK | 1:10000 |

Table S2.

**The Primers of Homo sapiens**

| *CASP1* F | TGGGACTCTCAGCAGATCAA |
| --- | --- |
| *CASP1* R | CTGCCGACTTTTGTTTCCAT |
| *CASP3* F | CATGGAAGCGAATCAATGGACT |
| *CASP3* R | CTGTACCAGACCGAGATGTCA |
| *CASP8* F | CGGACTCTCCAAGAGAACAGG |
| *CASP8* R | TCAAAGGTCGTGGTCAAAGCC |
| *CASP9* F | CTCAGACCAGAGATTCGCAAAC |
| *CASP9* R | GCATTTCCCCTCAAACTCTCAA |
| *BID* F | ATGGACCGTAGCATCCCTCC |
| *BID* R | GTAGGTGCGTAGGTTCTGGT |
| *BAD* F | CCCAGAGTTTGAGCCGAGTG |
| *BAD* R | CCCATCCCTTCGTCGTCCT |
| *BAX* F | CCCGAGAGGTCTTTTTCCGAG |
| *BAX* R | CCAGCCCATGATGGTTCTGAT |
| *BCL2* F | GGTGGGGTCATGTGTGTGG |
| *BCL2* R | CGGTTCAGGTACTCAGTCATCC |
| *LC3B* F | AAGGCGCTTACAGCTCAATG |
| *LC3B* R | CTGGGAGGCATAGACCATGT |
| *BECN1* F | GGTGTCTCTCGCAGATTCATC |
| *BECN1* R | TCAGTCTTCGGCTGAGGTTCT |
| *ATG4B* F | GGTGTGGACAGATGATCTTTGC |
| *ATG4B* R | CCAACTCCCATTTGCGCTATC |
| *ATG5* F | AGAAGCTGTTTCGTCCTGTGG |
| *ATG5* R | AGGTGTTTCCAACATTGGCTC |
| *ATG7* F | ATGATCCCTGTAACTTAGCCCA |
| *ATG7* R | CACGGAAGCAAACAACTTCAAC |
| *ATG10* F | ATAAGATGCGACTGCTACAGGG |
| *ATG10* R | CAATGCTCAGCCATGATGTGAT |
| *ACTIN, beta* F | CATGTACGTTGCTATCCAGGC |
| *ACTIN, beta* R | CTCCTTAATGTCACGCACGAT |

**The Primers of Mus**

| *Lc3b* F | TTATAGAGCGATACAAGGGGGAG |
| --- | --- |
| *Lc3b* R | CGCCGTCTGATTATCTTGATGAG |
| *Atg4b* F | TATGATACTCTCCGGTTTGCTGA |
| *Atg4b* R | GTTCCCCCAATAGCTGGAAAG |
| *Atg5* F | TGTGCTTCGAGATGTGTGGTT |
| *Atg5* R | GTCAAATAGCTGACTCTTGGCAA |
| *Atg7* F | GTTCGCCCCCTTTAATAGTGC |
| *Atg7* R | TGAACTCCAACGTCAAGCGG |
| *Atg10* F | GTAGTTACCAAGTGCCGGTTC |
| *Atg10* R | AGCTAACGGTCTCCCATCTAAA |
| *Becn1* F | ATGGAGGGGTCTAAGGCGTC |
| *Becn1* R | TCCTCTCCTGAGTTAGCCTCT |
| *Actin, beta* F | GGCTGTATTCCCCTCCATCG |
| *Actin, beta* R | CCAGTTGGTAACAATGCCATGT |
